# Supplementary material
Source: PubMed Central journal article supplement (PMC3478053)
Supplement: supp_mcs194_mcs194supp.pdf [file supp_mcs194_mcs194supp.pdf]

## SUPPLEMENTARY DATA

TABLE S1. Locations of the 85 populations of *Beta vulgaris* ssp. *maritima* sampled in this study and used in the sequential greenhouse germination test. Populations 3, 4, 19, 26, 71 and 72 were sampled again in 2006 to compare dormancy between two consecutive years. Populations 2, 3, 4, 10, 16, 19, 29, 37, 41, 60, 63, 68, 70, 75, 81, 84 were also used in the common garden experiment. Populations 3, 16, 37, 63 and 70 were also used in the control experiment.

| N° | Locations              | Latitude | Longitude | N° | Locations            | Latitude | Longitude |
|----|------------------------|----------|-----------|----|----------------------|----------|-----------|
| 1  | Hem de Mark            | 50.982   | 2.000     | 44 | Ré Island            | 46.231   | -1.416    |
| 2  | Les huttes d'Oye       | 50.983   | 2.345     | 45 | Ré Island            | 46.163   | -1.279    |
| 3  | Audresselles           | 50.750   | 1.500     | 46 | Ré Island            | 46.145   | -1.316    |
| 4  | Etaples                | 50.675   | 1.617     | 47 | Châtelaillon plage   | 46.067   | -1.093    |
| 5  | Bréhat Island          | 48.865   | -2.986    | 48 | Oléron Island        | 46.045   | -1.399    |
| 6  | Bréhat Island          | 48.854   | -2.997    | 49 | Oléron Island        | 46.014   | -1.336    |
| 7  | Bréhat Island          | 48.850   | -2.999    | 50 | Oléron Island        | 45.913   | -1.324    |
| 8  | Bréhat Island          | 48.846   | -2.998    | 51 | Pointe de Chapus     | 45.854   | -1.167    |
| 9  | Trégastel              | 48.825   | -3.504    | 52 | Oléron island        | 45.847   | -1.207    |
| 10 | Pointe de l'Arcouest   | 48.822   | -3.014    | 53 | Ronces les bains     | 45.793   | -1.177    |
| 11 | Batz Island            | 48.753   | -4.014    | 54 | La Tremblade         | 45.793   | -1.145    |
| 12 | Batz Island            | 48.744   | -4.037    | 55 | La Tremblade         | 45.784   | -1.129    |
| 13 | Batz Island            | 48.743   | -4.016    | 56 | La Grande Côte       | 45.647   | -1.114    |
| 14 | Batz Island            | 48.741   | -4.006    | 57 | Meschers             | 45.557   | -0.945    |
| 15 | Roscoff                | 48.713   | -3.997    | 58 | Talmont              | 45.539   | -0.907    |
| 16 | Cancale                | 48.699   | -1.850    | 59 | Mortagne sur Gironde | 45.475   | -0.798    |
| 17 | Plouha                 | 48.675   | -2.883    | 60 | Pointe aux oiseaux   | 45.473   | -1.002    |
| 18 | Anse de kernic         | 48.669   | -4.212    | 61 | Port de Goulée       | 45.404   | -0.910    |
| 19 | Plestin les grèves     | 48.669   | -3.607    | 62 | Pauillac             | 45.195   | -0.744    |
| 20 | Guisseny               | 48.638   | -4.410    | 63 | Ares                 | 44.762   | -1.147    |
| 21 | Sable d'or les pins    | 48.637   | -2.410    | 64 | Cassyl               | 44.709   | -1.057    |
| 22 | Mont Saint Michel      | 48.631   | -1.509    | 65 | Nerac                | 44.138   | 0.342     |
| 23 | Phare de l'île vierge  | 48.626   | -4.565    | 66 | Contis plage         | 44.089   | -1.323    |
| 24 | La richardais          | 48.611   | -2.035    | 67 | Castelnau d'Arbieu   | 43.883   | 0.707     |
| 25 | Notre Dame du Guildo   | 48.573   | -2.212    | 68 | Grenade              | 43.773   | 1.296     |
| 26 | port Saint hubert      | 48.535   | -1.972    | 69 | Maugio               | 43.588   | 4.020     |
| 27 | Telgruc sur mer        | 48.210   | -4.369    | 70 | Vacarès              | 43.566   | 4.590     |
| 28 | Nevez                  | 47.789   | -3.804    | 71 | La Grande Motte      | 43.563   | 4.101     |
| 29 | Etel                   | 47.655   | -3.205    | 72 | Palavas les Flots    | 43.523   | 3.918     |
| 30 | Port Blanc             | 47.604   | -2.864    | 73 | Frontignan           | 43.445   | 3.761     |
| 31 | Piriac sur mer         | 47.383   | -2.536    | 74 | Mèze                 | 43.430   | 3.613     |
| 32 | Saint-Brévin les pins  | 47.269   | -2.150    | 75 | Eromardie            | 43.408   | -1.639    |
| 33 | Saint Michel-Chef-Chef | 47.197   | -2.158    | 76 | Castelnaudary        | 43.334   | 1.955     |
| 34 | Préfaïlles             | 47.136   | -2.242    | 77 | La Tamarissière      | 43.283   | 3.443     |
| 35 | Noirmoutier Island     | 47.028   | -2.263    | 78 | Les Goudes           | 43.223   | 5.346     |
| 36 | Noirmoutier Island     | 46.971   | -2.213    | 79 | Puichéric            | 43.223   | 2.620     |
| 37 | Bretignoles sur mer    | 46.618   | -1.870    | 80 | Marseillette         | 43.212   | 2.537     |
| 38 | Sables d'olonne        | 46.525   | -1.809    | 81 | La Ciotat            | 43.181   | 5.613     |
| 39 | Talmont Saint Hilaire  | 46.432   | -1.635    | 82 | Narbonne plage       | 43.169   | 3.184     |
| 40 | Ecluse du Broult       | 46.342   | -1.158    | 83 | Les Bages            | 43.120   | 2.990     |
| 41 | Aiguillon sur mer      | 46.294   | -1.254    | 84 | Leucate              | 42.905   | 3.042     |
| 42 | Pointe Saint Clément   | 46.254   | -1.139    | 85 | Grau de Leucate      | 42.889   | 3.048     |
| 43 | Ré Island              | 46.244   | -1.562    |    |                      |          |           |

TABLE S2. Variation range of the bioclimatic variables.

| Bioclimatic variable                        | Unit          | Mean   | Min    | Max    | SD     |
|---------------------------------------------|---------------|--------|--------|--------|--------|
| Annual mean temperature                     | °C            | 12.45  | 10.43  | 15.24  | 1.18   |
| Mean monthly temperature range <sup>a</sup> | °C            | 7.79   | 5.86   | 10.51  | 1.33   |
| Isothermality <sup>b</sup>                  | °C            | 37.11  | 31.33  | 41.21  | 1.91   |
| Temperature seasonality <sup>c</sup>        | °C            | 502.47 | 375.74 | 618.51 | 65.5   |
| Maximum temperature of warmest month        | °C            | 23.82  | 20     | 29     | 2.86   |
| Minimum temperature of coldest month        | °C            | 2.85   | 0.7    | 4.7    | 0.75   |
| Temperature annual range <sup>d</sup>       | °C            | 20.97  | 16.1   | 27.1   | 3.27   |
| Mean temperature of wettest quarter         | °C            | 9.18   | 6.1    | 15.32  | 2.6    |
| Mean temperature of driest quarter          | °C            | 17.55  | 6.55   | 22.55  | 3.49   |
| Mean temperature of warmest quarter         | °C            | 18.65  | 15.93  | 22.55  | 1.91   |
| Mean temperature of coldest quarter         | °C            | 6.36   | 4.25   | 8.55   | 0.74   |
| Annual precipitation                        | mm            | 820.67 | 599    | 1327   | 140.45 |
| Precipitation in the wettest month          | mm            | 101.59 | 74     | 160    | 16.82  |
| Precipitation in the driest month           | mm            | 40.52  | 12     | 68     | 10.79  |
| Precipitation seasonality <sup>e</sup>      | dimensionless | 27.55  | 12.5   | 40.73  | 5.77   |
| Mean precipitation in the wettest quarter   | mm            | 276.45 | 202    | 439    | 53.19  |
| Mean precipitation in the driest quarter    | mm            | 144.38 | 72     | 253    | 31     |
| Mean precipitation in the warmest quarter   | mm            | 160.04 | 72     | 276    | 36.61  |
| Mean precipitation in the coldest quarter   | mm            | 248.34 | 150    | 398    | 59.66  |

<sup>a</sup> Mean of monthly (maximum temperature – minimum temperature)

<sup>b</sup> (Mean monthly temperature range/Temperature annual range) × 100

<sup>c</sup> Standard deviation × 100

<sup>d</sup> Maximum temperature of warmest month – Minimum temperature of coldest month

<sup>e</sup> Coefficient of variation
